# Supplementary material for: Functionalization of SF/HAP Scaffold with GO-PEI-miRNA inhibitor Complexes to Enhance Bone Regeneration through Activating Transcription Factor 4
Source: PubMed Central journal article supplement — Theranostics. 2019 Jun 9;9(15):4525–41. doi: 10.7150/thno.34676 (PMC6599658; doi:10.7150/thno.34676), 2019-06-09
Supplement: thnov09p4525s1.pdf [file thnov09p4525s1.pdf]

---

**Functionalization of SF/HAP Scaffold with GO-PEI-miRNA inhibitor Complexes to  
Enhance Bone Regeneration through Activating Transcription Factor 4**

Lingling Ou <sup>a</sup>, Yong Lan <sup>b</sup>, Zhiqiang Feng <sup>a</sup>, Longbao Feng <sup>b</sup>, Junjie Yang <sup>a</sup>, Yu Liu <sup>c</sup>, Liming Bian <sup>d</sup>,  
Jiali Tan <sup>e</sup>, Renfa Lai <sup>a,\*</sup>, Rui Guo <sup>f,\*</sup>

<sup>a</sup>The First Affiliated Hospital of Jinan University, Guangzhou, 510632, China

<sup>b</sup>Beogene Biotech (Guangzhou) CO., LTD, Guangzhou 510663, China

<sup>c</sup>Guangzhou Chuangseed Biomedical Materials CO., LTD, Guangzhou 510663, China

<sup>d</sup>Department of Biomedical Engineering, The Chinese University of Hong Kong, Hong Kong SAR, China

<sup>e</sup>Department of Orthodontics, Guanghua School of Stomatology, Hospital of Stomatology, Sun Yat-sen University and Guangdong Provincial Key Laboratory of Stomatology, Guangzhou, 510055, China

<sup>f</sup>Key Laboratory of Biomaterials of Guangdong Higher Education Institutes, Guangdong Provincial Engineering and Technological Research Center for Drug Carrier Development, Department of Biomedical Engineering, Jinan University, Guangzhou 510632, China

\* Corresponding author:

Renfa Lai, the first affiliated hospital of Jinan University, No.613 West Huangpu Avenue, 510632, Guangzhou, China. E-mail: Prof.Dr.Lai@163.com.

Rui Guo, Key Laboratory of Biomaterials of Guangdong Higher Education Institutes, Guangdong Provincial Engineering and Technological Research Center for Drug Carrier Development,

---

Department of Biomedical Engineering, Jinan University, Guangzhou 510632, China. E-mail:  
guorui@jnu.edu.cn.

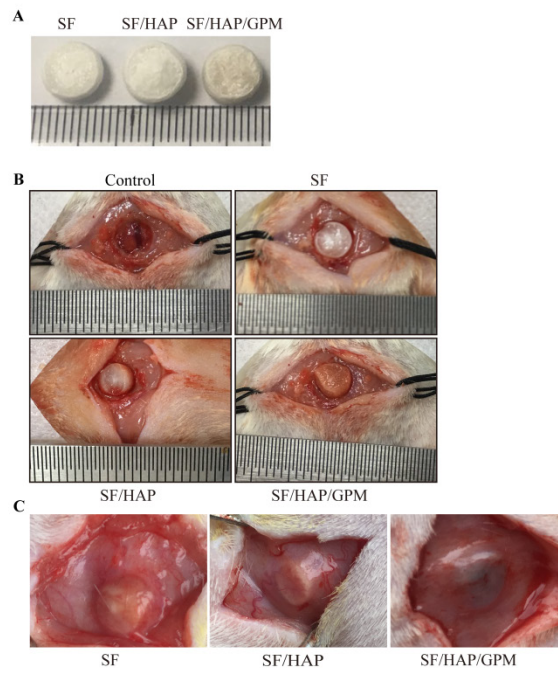

**Figure S1** (A) Representative images of the SF, SF/HAP and SF/HAP/GPM scaffolds. (B) Representative images of calvarial bone defects without or with SF, SF/HAP and SF/HAP/ GPM scaffolds. (C) Image of SF, SF/HAP and SF/HAP/ GPM scaffolds implanted subcutaneously on the back of nude mice after 4 weeks. The fibrous tissues and capillary vessels were observed to grow into the scaffolds.
